# Supplementary material for: CRISPR/Cas9-mediated gene knockout and interallelic gene conversion in human induced pluripotent stem cells using non-integrative bacteriophage-chimeric retrovirus-like particles
Source: PubMed Central journal article supplement (PMC8742436; doi:10.1186/s12915-021-01214-x), 2022-01-07
Supplement: 12915_2021_1214_MOESM1_ESM.pdf [file 12915_2021_1214_MOESM1_ESM.pdf]

# **Efficient CRISPR/Cas9-mediated gene knockout and interallelic gene conversion in human induced pluripotent stem cells using non-integrative bacteriophage-chimeric retrovirus-like particles**

Joffrey Mianné<sup>1</sup>, Amel Nasri<sup>1</sup>, Chloé Nguyen Van<sup>1</sup>, Chloé Bourguignon<sup>1</sup>, Mathieu Fieldès<sup>1</sup>, Engi Ahmed<sup>1</sup>, Christine Duthoit<sup>2</sup>, Nicolas Martin<sup>2</sup>, Hugues Parrinello<sup>3,4</sup>, Anaïs Louis<sup>3,4</sup>, Alexandra Iché<sup>2</sup>, Régis Gayon<sup>2</sup>, Florine Samain<sup>2</sup>, Lucille Lamouroux<sup>2</sup>, Pascale Bouillé<sup>2</sup>, Arnaud Bourdin<sup>5</sup>, Said Assou<sup>1</sup>, John De Vos<sup>1,6\*</sup>

***Supplementary Materials***

***Supplementary figures***

## Legend to Supplementary Figures

Supplementary Figure S1: Transduction of the HY03 hiPSC line with LF-ZsGreen particles allows transient ZsGreen expression and does not affect pluripotency. **a** Time course analysis of ZsGreen expression in HY03 cells transduced with LF-ZsGreen particles at 0.5, 2 or 5 pg p24/cell. Fluorescent microscopy analysis of cells during the first 6 days post-transduction. **b** Fold change of ZsGreen fluorescence intensity measured by flow cytometry analysis during 10 days post-transduction (NT, not-transduced cells = 1). **c** Immunofluorescence analysis of pluripotency markers (OCT3/4, SSEA4, NANOG and SOX2) in HY03 cells transduced with 2 pg p24/cell LF-ZsGreen particles (at passage 2 post-transduction). 488 and 555, Alexa-Fluor 488 and 555 negative controls. **d** Characterization of definitive endoderm cells obtained from the directed differentiation of HY03 hiPSC cells transduced with 2 pg p24/cell of LF-ZsGreen particles. Left: CXCR4 flow cytometry analysis. Right: Immunofluorescence microscopy analysis of FOXA2 and SOX17 expression. PE, phycoerythrin staining.

Supplementary Figure S2: LF-ZsGreen particles allow the highly efficient delivery of RNA in different hiPSC lines. **a** Fluorescent microscopy analysis of the iCOPD9\_B27 (left) and PCD\_02:30 (right) hiPSC lines at 48h post-transduction with LF-ZsGreen particles at 0.5, 2 or 5 pg p24/cell. **b** Transduction efficacy in iCOPD9\_B27 and PCD\_02:30 cells measured by flow cytometry quantification of ZsGreen-positive cells at 48h post-transduction. NT, not-transduced cells. **c** Mean fluorescent intensity (MFI) fold change in iCOPD9\_B27 and PCD\_02:30 cells assessed by cytometry analysis at 48h post-transduction (NT, not-transduced cells = 1). **d** Immunofluorescence analysis of pluripotency markers (OCT3/4, SSEA4, NANOG and SOX2) in iCOPD9\_B27 (left) and PCD\_02:30 (right) cells transduced with 2 pg p24/cell of LF-ZsGreen particles (passage 2 after transduction). 488 and 555, Alexa-Fluor 488 and 555 negative controls.

Supplementary Figure S3: Characterization of the HY03-GFP non-clonal reporter hiPSC line. **a** Fluorescent microscopy analysis of GFP expression. **b** GFP allele copy number (average = 2.42) measured by ddPCR. **c** Immunofluorescence analysis of pluripotency markers (OCT3/4, SSEA4, NANOG and SOX2). 488 and 555, Alexa-Fluor 488 and 555 negative controls. **d** Genomic integrity analysis by ddPCR of the 24 most recurrent loci found aneuploid in hiPSC.

Supplementary Figure S4: NGS analysis of DNAH5 indel size distribution. CRISPResso2 analysis of DNAH5 indel size distribution by NGS following LentiFlash® transduction of HY03 iPSC.

Supplementary Figure S5: LentiFlash® particle-based transduction of the CRISPR/Cas9 system to target the GFP fluorescent reporter sequence in a HCT116-GFP cell line that contains one GFP copy per cell. Data were obtained by flow cytometry on day 7 post-transduction. NT: non-transduced cells. LentiFlash® particles were produced with (i) an expression plasmid containing only Cas9-MS2, (ii) two expression plasmids containing sgRNAGFP-PP7 and Cas9 without the MS2 aptamers, respectively, (iii) two expression plasmids containing sgRNAGFP-PP7 or Cas9-MS2, respectively, and (iv) sgRNAGFP-PP7 and Cas9-MS2 in a single plasmid.

Supplementary Figure S6: Characterization of hiPSC clones in which *DNAH5* or *MCIDAS* was knocked out by CRISPR/Cas9 gene editing using the LentiFlash® system. **a** Nucleotide sequence analysis of the *DNAH5* and *MCIDAS* loci in the DNAH5\_A4 (left) and MCIDAS\_E1 (right) knock-out clones, respectively. The DNAH5\_A4 line harbors a heterozygote composite mutation with one allele carrying a combination of 4-nucleotide deletion and 2-nucleotide insertion (Del4ins2 allele), and a second allele a 7-nucleotide deletion (Del7 allele). The MCIDAS\_E1 line harbors a homozygote mutation with 1 nucleotide inserted at the targeted locus (Ins1 alleles). \*indicates the nucleotide insertion. **b** Immunofluorescence analysis of pluripotency markers (OCT3/4, SSEA4, NANOG and SOX2) in DNAH5\_A4 (left) and MCIDAS\_E1 (right) cells. 488 and 555, Alexa-Fluor 488 and 555 negative controls. **c** Analysis of potential off-target (OT) sites containing up to 3 mismatches by Sanger sequencing of DNAH5\_A4 (top) and MCIDAS\_E1 cells (bottom). MMs, mismatches. **d** Genomic integrity analysis by ddPCR of the 24 most recurrent loci found aneuploid in hiPSC. **e** Cas9 genotyping PCR. First lane : no template. Second lane : positive control (pX458 plasmid).

Supplementary Figure S7: LentiFlash® particle-based transduction of the CRISPR/Cas9 components to target specific genes results in high indel formation in different hiPSC lines. Indel rate at four loci (*MCIDAS*, *DNAH5*, *TRAC* and *CXCR4*) using optimized particle doses (0.5, 0.5, 2 and 7.5 pg p24/cell for *MCIDAS*, *DNAH5*, *TRAC* and *CXCR4* respectively) in the HY03, iCOPD9\_B27 and PCD\_02:30 hiPSC lines at day 3 post-transduction. Data were obtained by ICE decomposition analysis after Sanger sequencing of the targeted loci.

Supplementary Figure S8: Interallelic gene conversion following iPSC electroporation and following LentiFlash® transduction of neural progenitors obtained from the PCD\_02:30 hiPSC line results. **a** Interallelic gene conversion after electroporation of PCD\_02:30 iPSC with CRISPR/Cas9 RNPs targeting the  $\Delta$ -2nt allele. Allelic composition at the targeted locus by ICE analysis. NT: no transduction **b** Immunofluorescence analysis of neuronal markers (human nestin and PAX6) in neural progenitors obtained from the differentiation of PCD\_02:30 cells after 12 days of induction. 555, Alexa-Fluor 555 negative control. **c** Targeting of the  $\Delta$ -2nt allele by transducing PCD\_02:30 neural progenitor cells with LF-CRISPR/Cas9-CCDC40-YGT particles at 0.5, 2 and 5 pg p24/cell results in dose-dependent interallelic gene conversion. Left: Allelic composition at the targeted locus. Right: Representative Sanger sequencing chromatograms. ICE, Inference of CRISPR Edits; WT, wild-type; NT, not-transduced.

Supplementary Figure S9: Characterization of hiPSC clonal lines harboring *DNAH5* heterozygous mutations. **a** Nucleotide sequence composition for the DNAH5\_A6, DNAH5\_C3 and DNAH5\_B5 clones harboring *DNAH5* heterozygous mutations obtained by LF-CRISPR/Cas9-DNAH5 particle-based transduction. Top: Sanger sequencing chromatograms. Bottom: nucleotide composition at the targeted locus. In DNAH5\_A6 cells, the mutant allele harbors a 7-nucleotide deletion (Del7 allele [ $\Delta$ -7nt]), DNAH5\_C3 cells a 1-nucleotide insertion (Ins1 allele [ $\Delta$ +1nt]) and DNAH5\_B5 a 1-nucleotide deletion associated with a 2-nucleotide insertion (Del1/Ins2 allele [ $\Delta$ -1/+2nt]). **b** Immunofluorescence analysis of pluripotency markers (OCT3/4, SSEA4, NANOG and SOX2) in DNAH5\_A6 (top left), DNAH5\_C3 (top right) and DNAH5\_B5 (bottom) cells. 488 and 555, Alexa-Fluor 488 and 555 negative controls. **c** Analysis of potential OT sites containing up to 3 mismatches by Sanger sequencing of DNAH5\_A6, DNAH5\_C3 and DNAH5\_B5 cells. MMs, mismatches. **d** Genomic integrity analysis by ddPCR

analysis of the 24 most recurrent loci found aneuploid in hiPSC DNAH5\_A6 (top left), DNAH5\_C3 (top right) and DNAH5\_B5 (bottom).

Supplementary Figure S10: Specifically targeting the wild-type allele in hiPSC clones harboring a *DNAH5* heterozygous mutation results in interallelic gene conversion. Targeting the WT allele in DNAH5\_A6, DNAH5\_C3 and DNAH5\_B5 cells by transduction of LF-CRISPR/Cas9-DNAH5 particles at 0.5 pg p24/cell resulted in interallelic gene conversion. **a** ICE analysis results before and after transduction in hiPSC DNAH5\_A6 (top left), DNAH5\_C3 (top right) and DNAH5\_B5 (bottom). **b** Sanger sequencing chromatograms showing the allelic composition at the targeted locus in the three cell lines before and after LF-CRISPR/Cas9-DNAH5 particles transduction. WT, wild-type.

Supplementary Figure S11: (A) Schematic representation of the expression cassettes carried by the plasmids used to produce the integrative lentiviral vector (ILV) that expresses the GFP reporter. pLV-GFP: GFP expression cassette encoded by the HIV-1 self-inactivating (SIN) transfer plasmid and driven by the short EF1 alpha promoter (EFS). Indicated are the RSV-U3 5' LTR (chimeric long-terminal repeat composed of Rous Sarcoma Virus U3 promoter, HIV-1 R and HIV-1 U5), rev-responsive element (RRE), woodchuck hepatitis virus post-transcriptional regulatory element (WPRE) and SIN HIV-1 3' LTR ( $\Delta$ U3, R, U5); pLV-GagPol (wt): standard HIV-1 trans-complementation packaging sequence expressed under the control of the CMV promoter; pVSVg: vesicular stomatitis virus envelope glycoprotein sequence expressed under the control of the CMV promoter. (B) Schematic representation of the expression cassettes carried by the plasmids used to produce non-integrative lentiviral particles (LentiFlash®) that express the ZsGreen reporter (top) or the CRISPR/Cas9 systems (bottom). pLF-ZsGreen is a construct with a PP7-driven RNA packaging sequence carrying the ZsGreen gene expressed under the EF1 alpha promoter with two copies of the 25-nt RNA stem-loop from the PP7 bacteriophage (PP7\_2X) inserted in the 3' untranslated region. pLF-GagPol ZF\_PCP is the packaging construct that contains the PP7 coat protein at the place of the second zinc finger (ZF2) of the NC. pLF\_CRISPR/Cas9 is a construct with heterologous PP7/MS2-driven RNA packaging sequences carrying: i) a single-guide RNA (sgRNA) sequence under the control of the U6 promoter with two copies of the 25-nt RNA stem-loop from the PP7 bacteriophage (PP7\_2X) inserted in the tetraloop and stem-loop 2 of the sgRNA scaffold, respectively, and ii) the SpCas9 gene expressed under the control of the EF1 promoter with 12 copies of the 19-nt RNA stem-loop from MS2 bacteriophage (MS2\_12X) inserted in the 3' untranslated region. pLF-GagPol MA\_MCP.ZF\_PCP is the packaging construct containing the MS2 coat protein inserted between the 127th and 128th amino acid of the MA protein and PP7 coat protein at the place of the ZF2 of the NC. CMV: human cytomegalovirus immediate early enhancer and promoter; MA: matrix; CA: capsid; NC: nucleocapsid; POL: polymerase; Ins2-pA: rat insulin-2 polyadenylation signal; HBB intron: internally truncated intron from human  $\beta$ -globin; HBB-pA: human  $\beta$ -globin polyadenylation signal; BGH-pA: Bovine growth hormone polyadenylation signal.

# Supplementary Figure S1

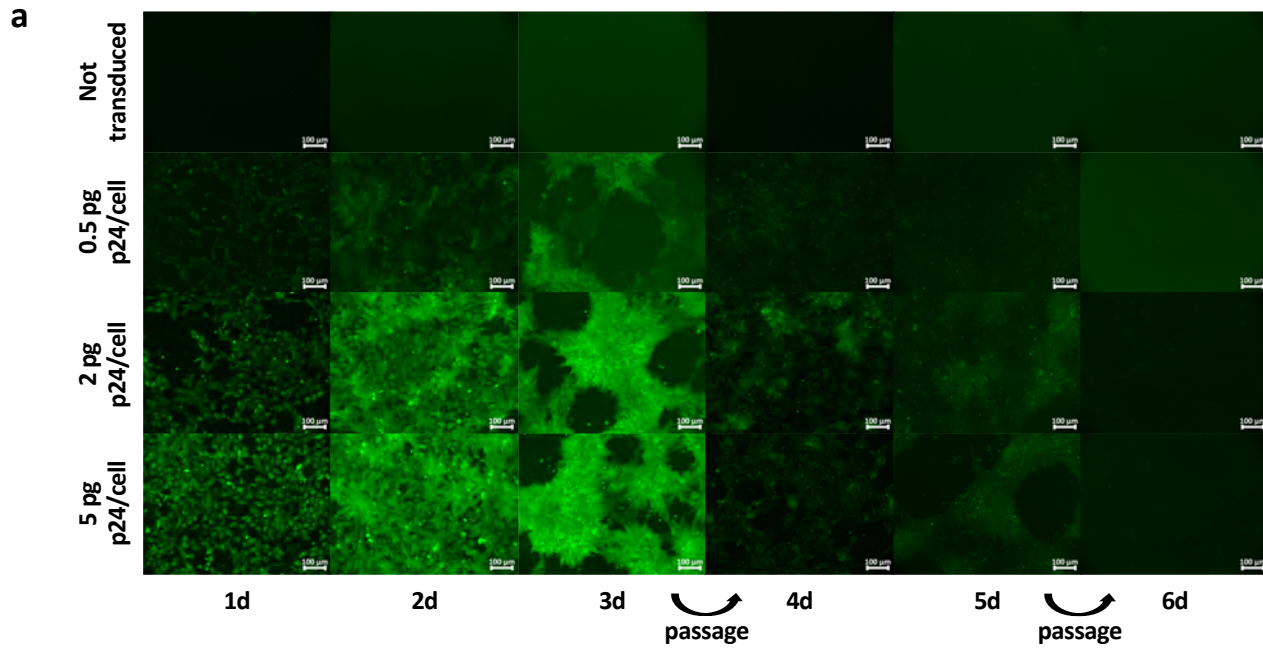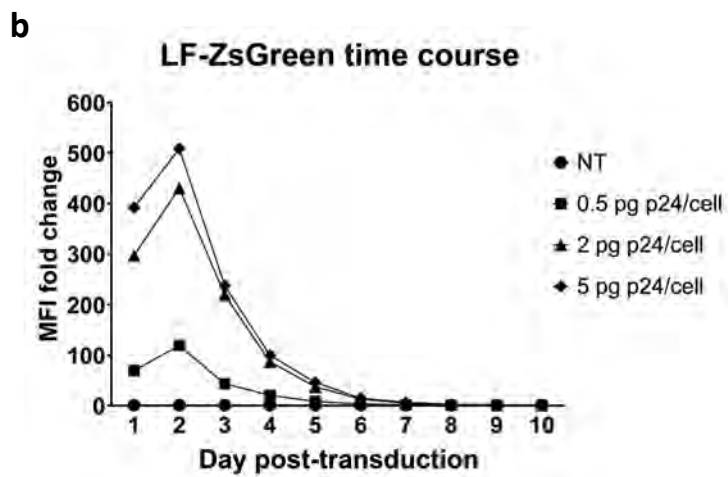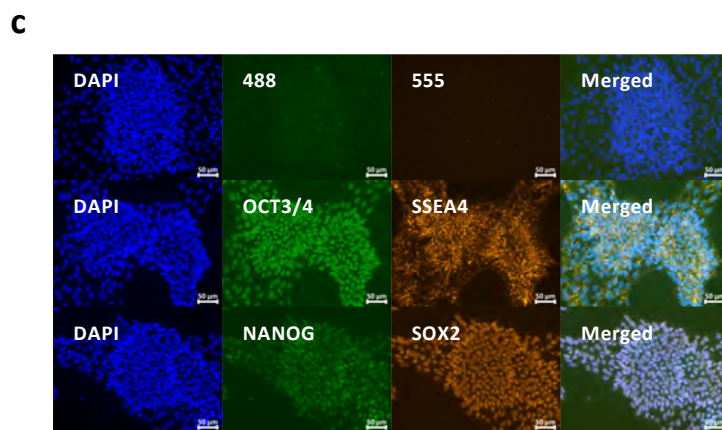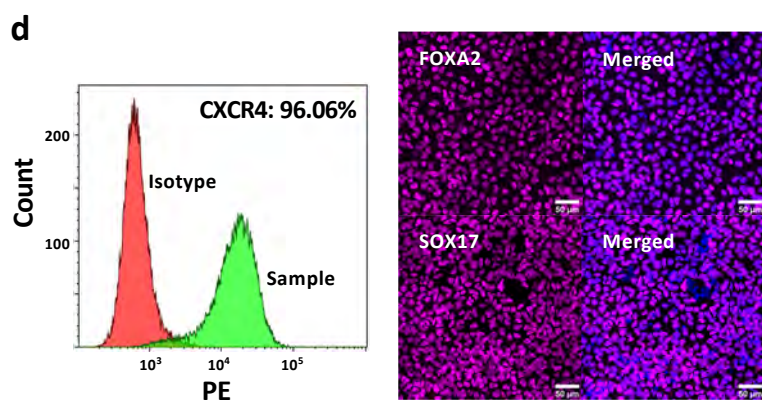

# Supplementary Figure S2

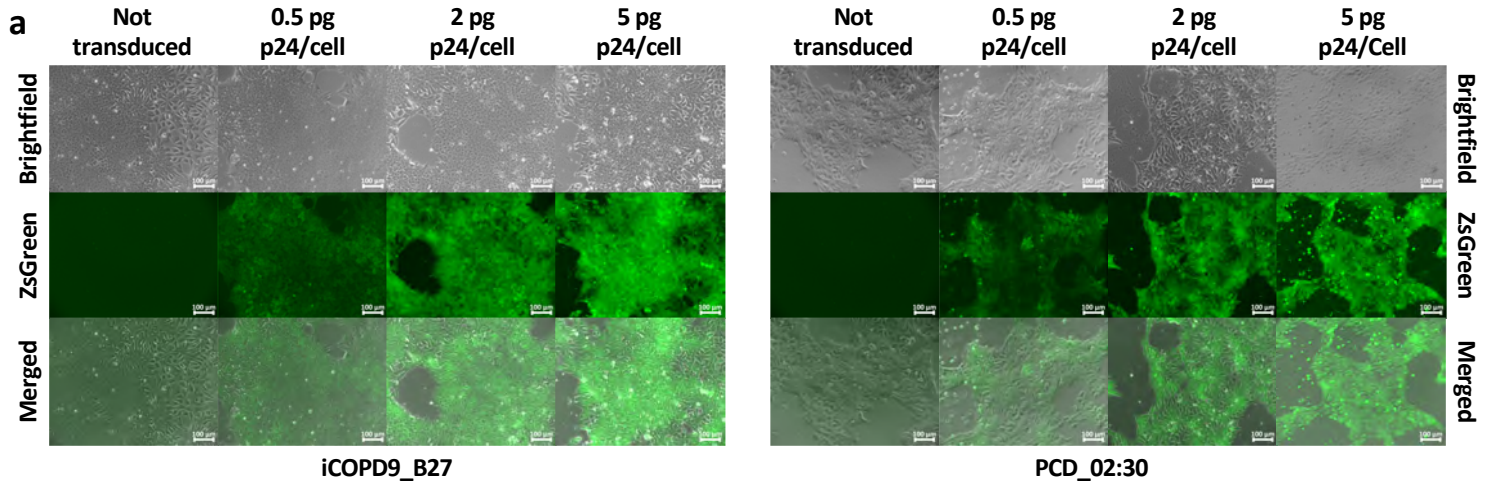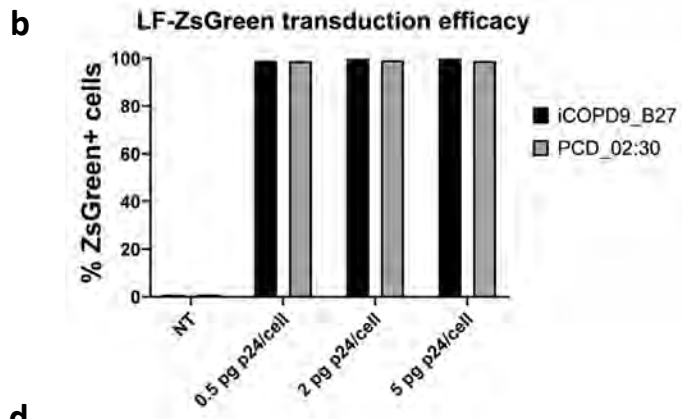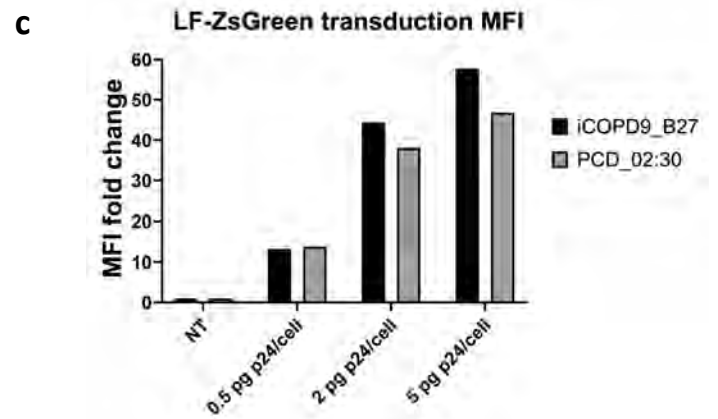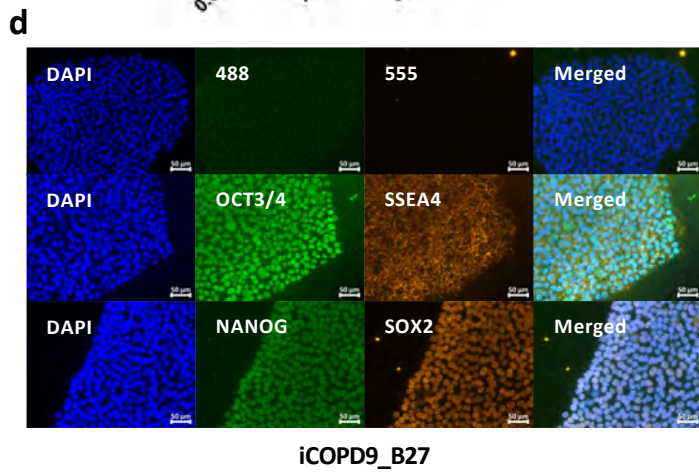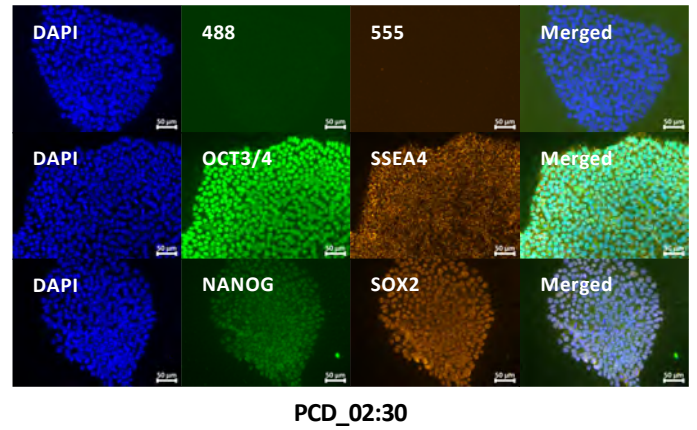

# Supplementary Figure S3

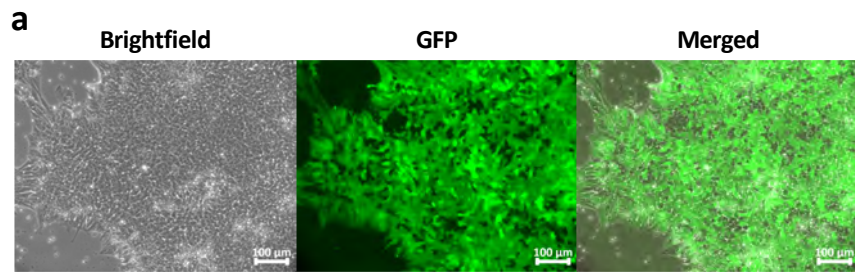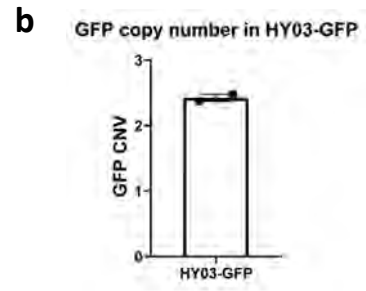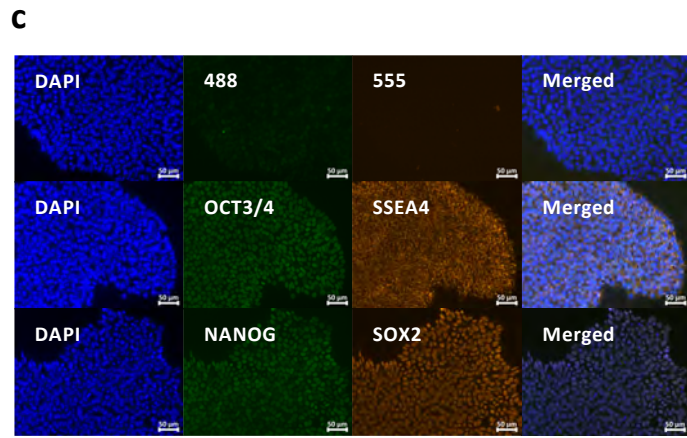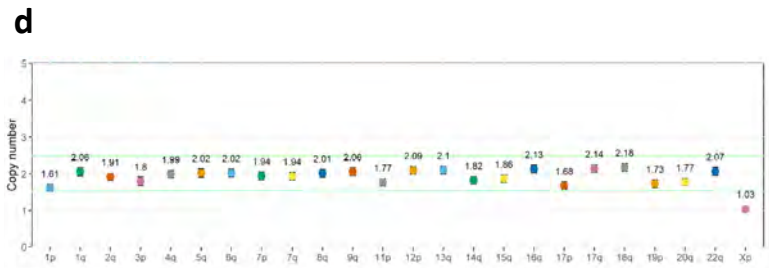



# Supplementary Figure S4

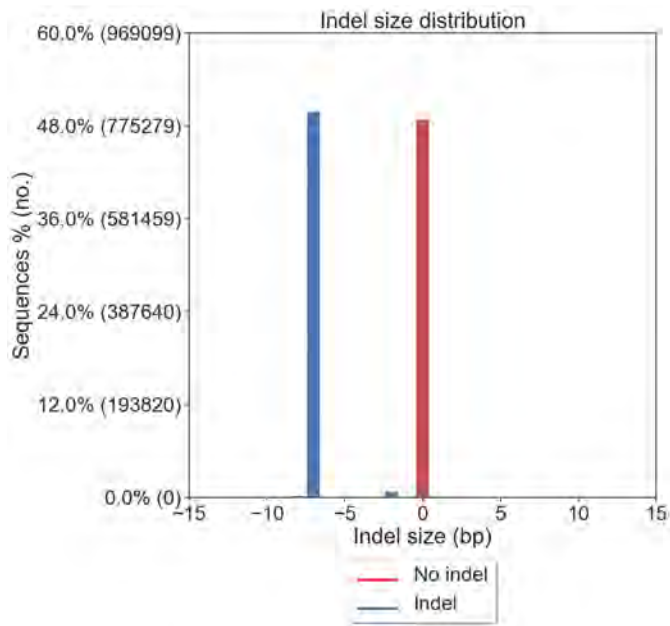

A G C G G A T G A C G T T G G G C C A C G A G C G G A G C T G G A G C A C T G G -Reference  
sgRNA  
A G C G G A T G A C G T T G - - - - - A G C G G A G C T G G A G C A C T G G - Δ-7nt  
A G C G G A T G A C G T T G G G - - A T G A G C G G A G C T G G A G C A C T G G - Δ-2nt

## Supplementary Figure S5

Passive vs. active encapsidation of Cas9 using LentiFlash® delivery tool for CRISPR/Cas9 genome editing

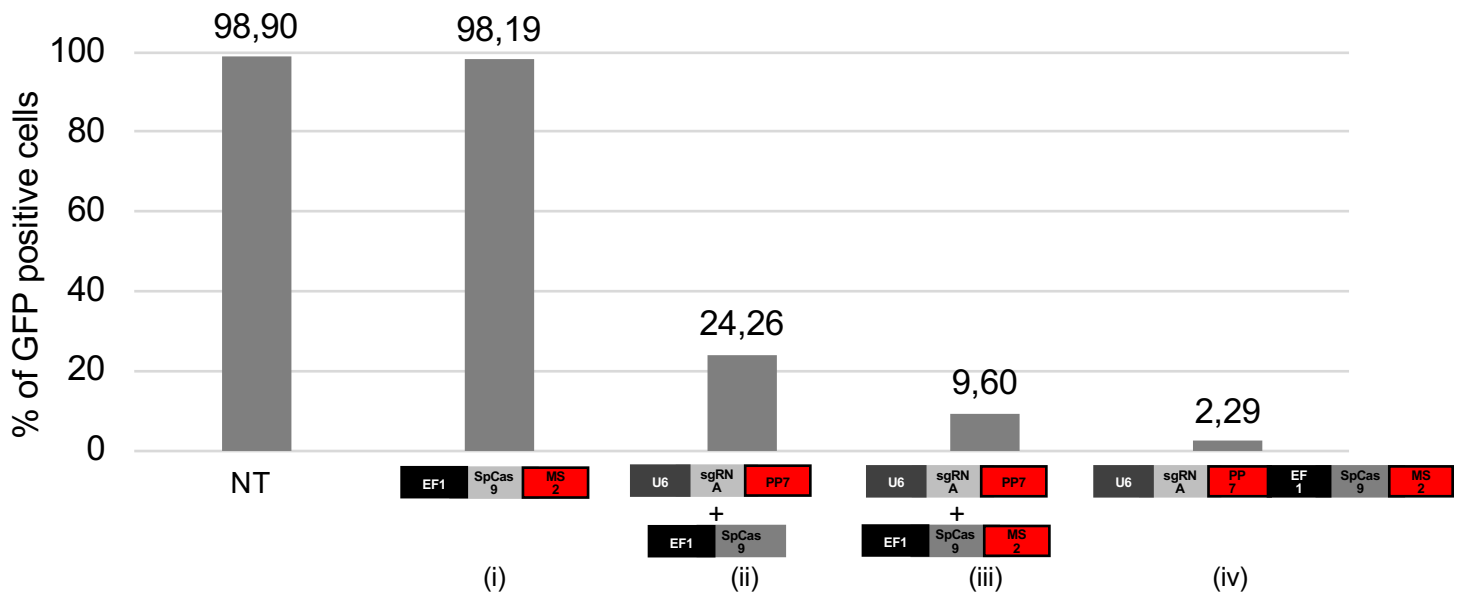

# Supplementary Figure S6

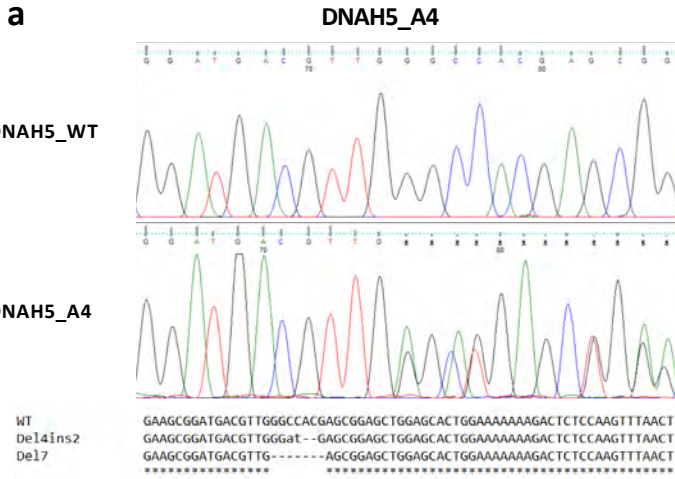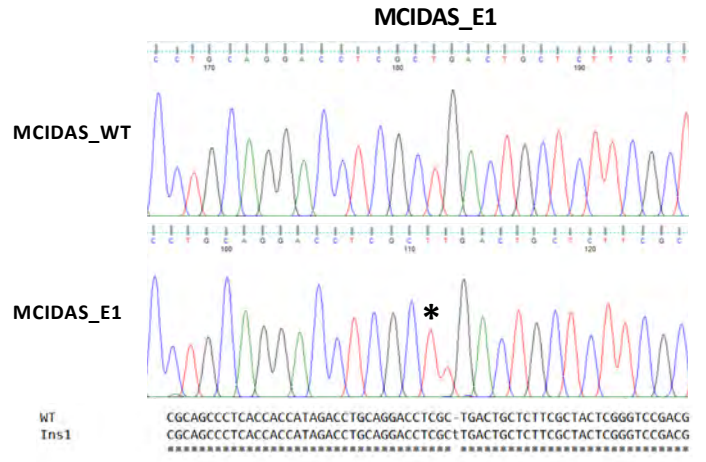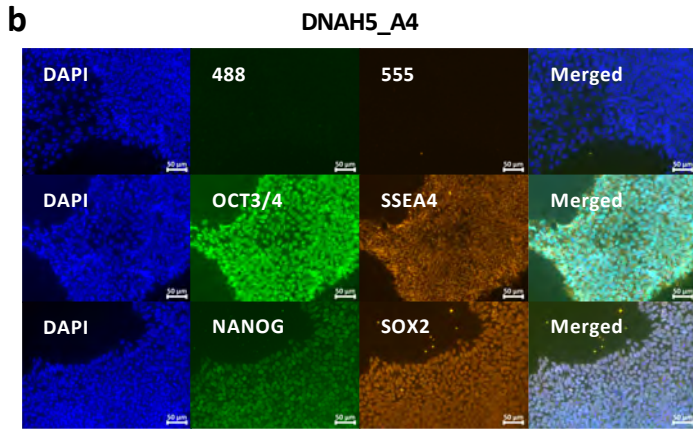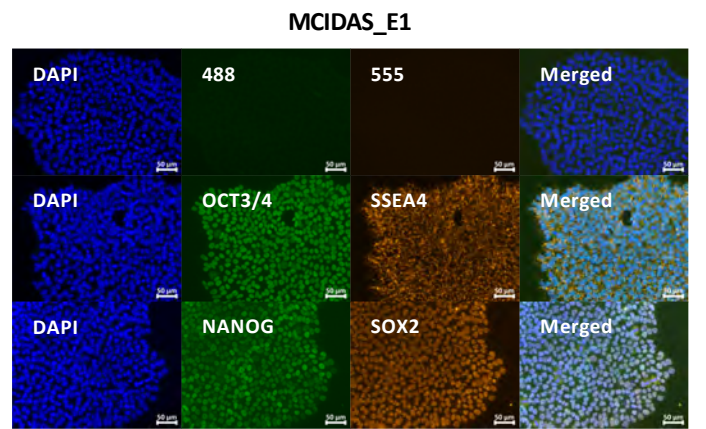

**c**

**DNAH5\_A4**

| Sequence  | Location                               | Sequence                 | MMs | Type       | A4 |
|-----------|----------------------------------------|--------------------------|-----|------------|----|
| On-target | <a href="#">5:13919295-13919317</a>    | GGATGACGTTGGGCCACGAG CGG | 0   | Exonic     | /  |
| OT_1      | <a href="#">13:76474926-76474948</a>   | GGATACCTTGGGCTACGAG GGG  | 3   | Intergenic | WT |
| OT_2      | <a href="#">17:76527465-76527487</a>   | GGATGAGGATGGGCCAGGAG GGG | 3   | Exonic     | WT |
| OT_3      | <a href="#">13:111514874-111514896</a> | GGATGACGCTGGGCCCGTG TGG  | 3   | Intergenic | WT |

**MCIDAS\_E1**

| Sequence  | Location                              | Sequence                 | MMs | Type       | E1 |
|-----------|---------------------------------------|--------------------------|-----|------------|----|
| On-target | <a href="#">5:55226620-55226642</a>   | GTAGCGAAGAGCAGTCAGCG AGG | 0   | Exonic     | /  |
| OT1       | <a href="#">6:167932507-167932529</a> | AAAGCGAATAGCAGTCAGCG TGG | 3   | Intronic   | WT |
| OT2       | <a href="#">22:41256116-41256138</a>  | GGAGGGAAGAGCAGTCAGCC GGG | 3   | Intronic   | WT |
| OT3       | <a href="#">19:41998579-41998598</a>  | GAGCGGAAGCAGTCAGCG AAG   | 3   | Exonic     | WT |
| OT4       | <a href="#">8:135020309-135020328</a> | GGAAACAAGAGCAGTCAGCG AGA | 3   | Intergenic | WT |
| OT5       | <a href="#">7:73443058-73443080</a>   | GCAACAAGAGCAGGCAAGCG GGG | 3   | Intronic   | WT |
| OT6       | <a href="#">X:142104307-142104326</a> | GTCTCGAAGAGCAGTCAGAG AGA | 3   | Intergenic | WT |

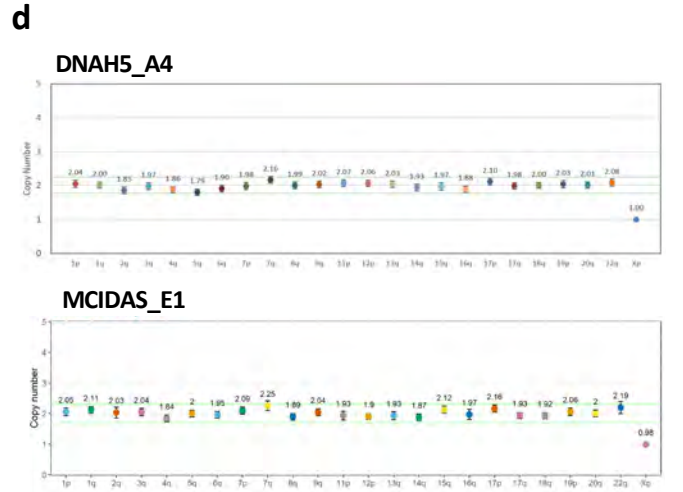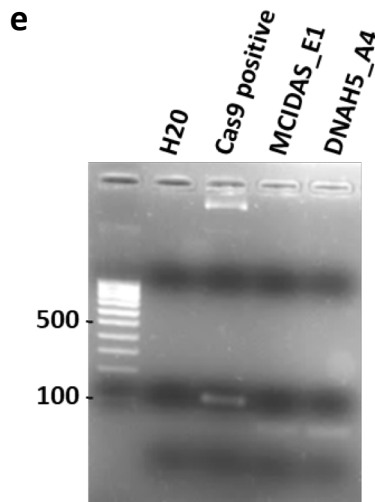

# Supplementary Figure S7

## LF-CRISPR/Cas9 efficacy in multiple cell lines

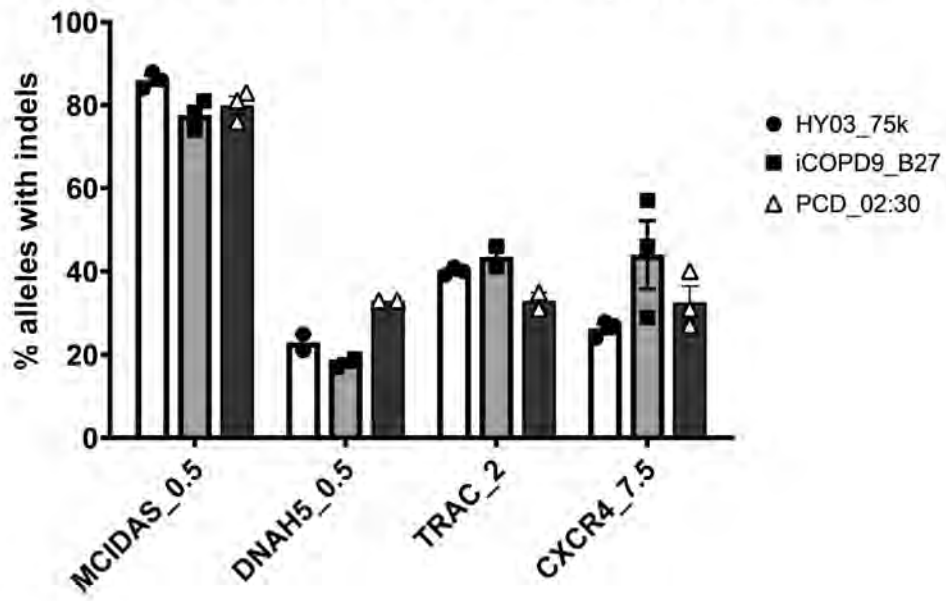

# Supplementary Figure S8

a

## CCDC40 allele 1 ( $\Delta$ -2nt) gene conversion

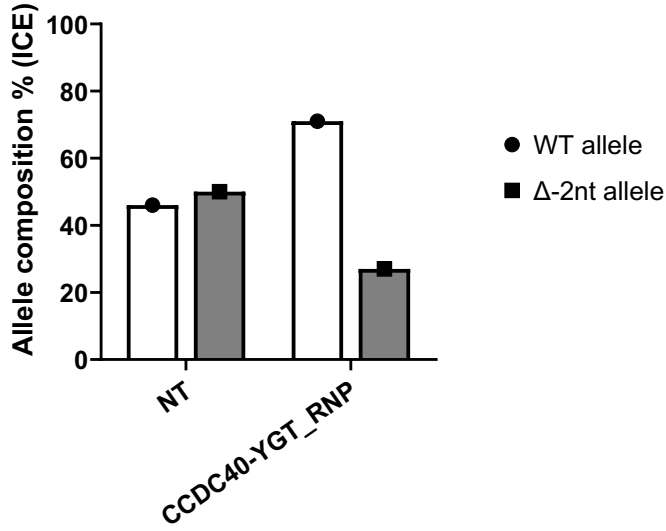

b

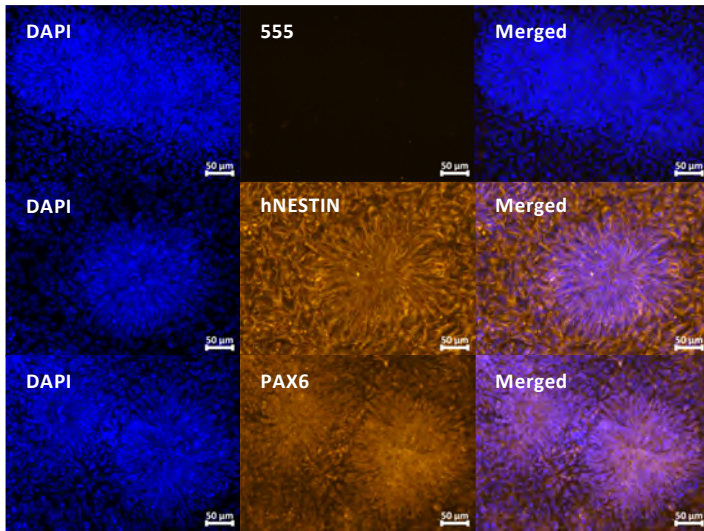

c

## CCDC40 allele composition in neural progenitors

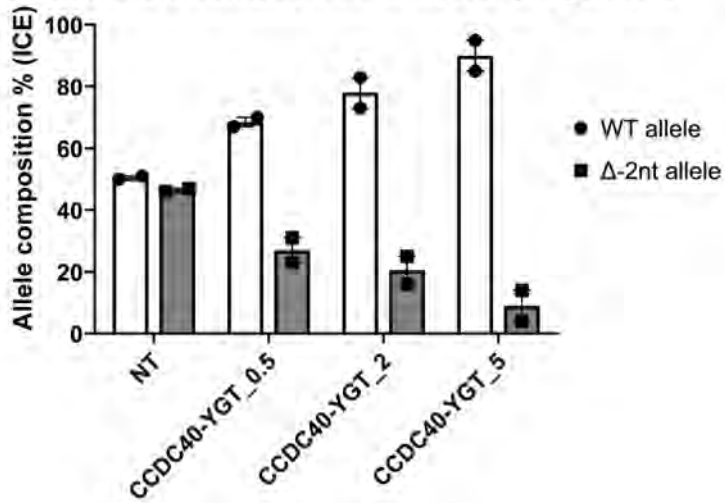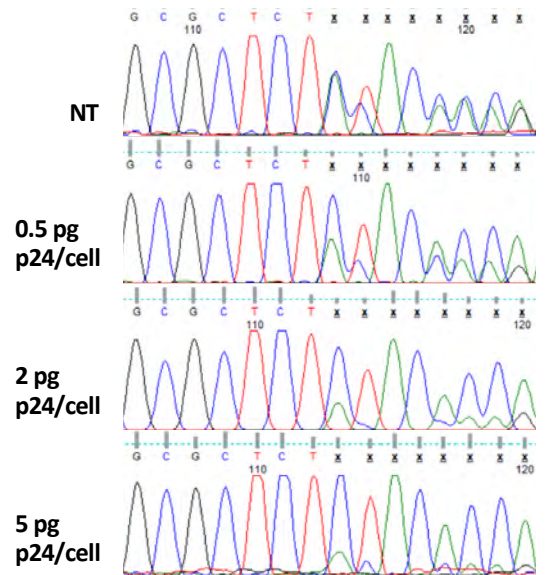

# Supplementary Figure S9

**a**

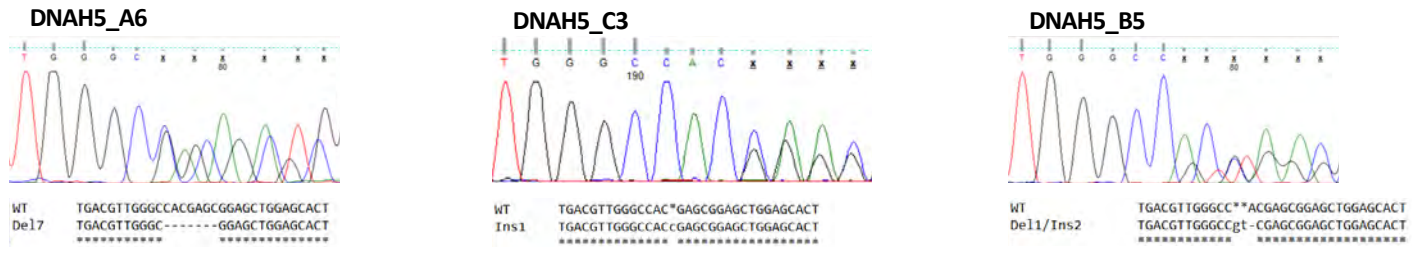

**b**

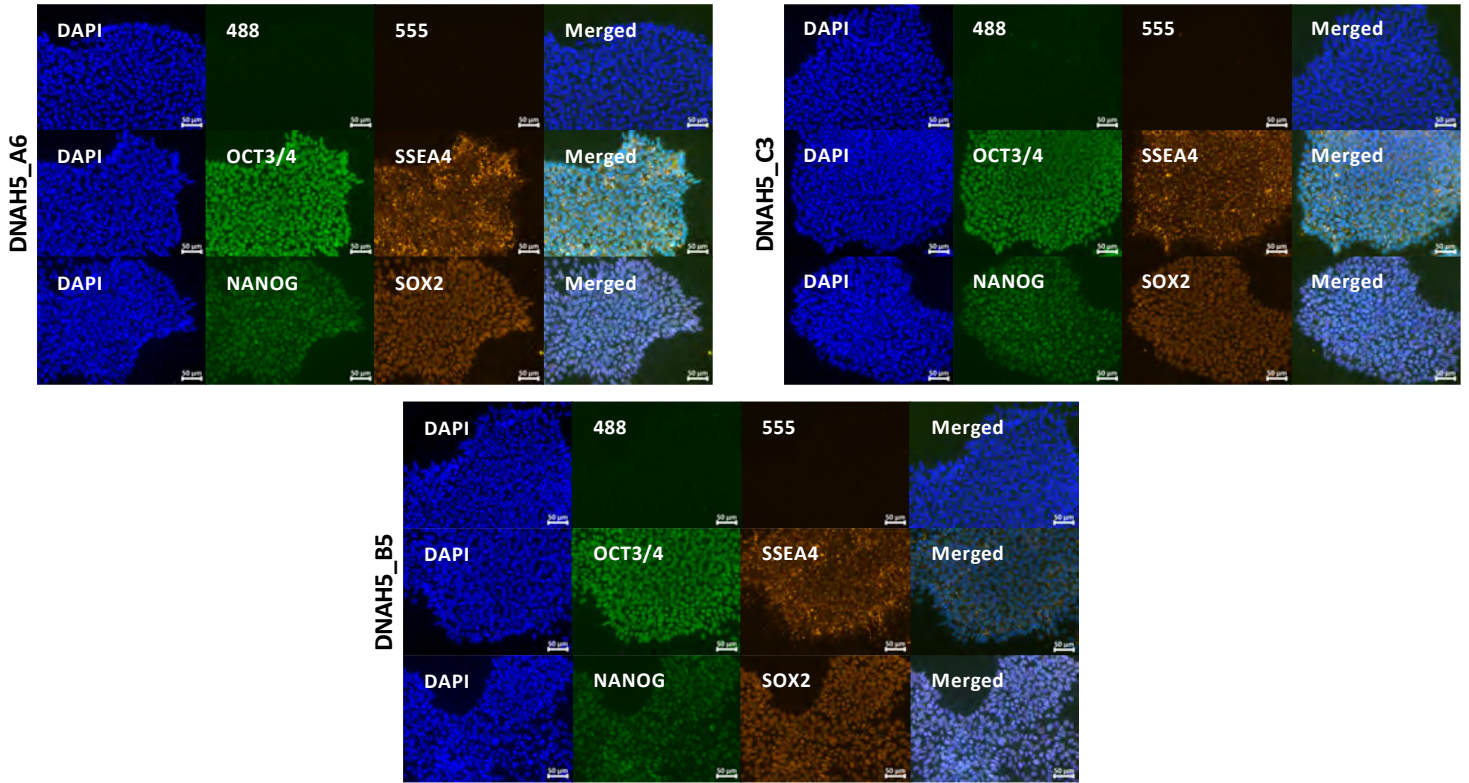

**c**

| Sequence  | Location                               | Sequence                  | MMs | Type       | A6  | C3  | B5  |
|-----------|----------------------------------------|---------------------------|-----|------------|-----|-----|-----|
| On-target | <a href="#">5:13919295-13919317</a>    | GGATGACGTTGGGCCACGAG CGG  | 0   | Exonic     | Het | Het | Het |
| OT_1      | <a href="#">13:76474926-76474948</a>   | GGATAACCTTGGGCTACGAG GGG  | 3   | Intergenic | WT  | WT  | WT  |
| OT_2      | <a href="#">17:76527465-76527487</a>   | GGATGAGGATGGGCCACGGAG GGG | 3   | Exonic     | WT  | WT  | WT  |
| OT_3      | <a href="#">13:111514874-111514896</a> | GGATGACGCTGGGCCCCGTG TGG  | 3   | Intergenic | WT  | WT  | WT  |

**d**

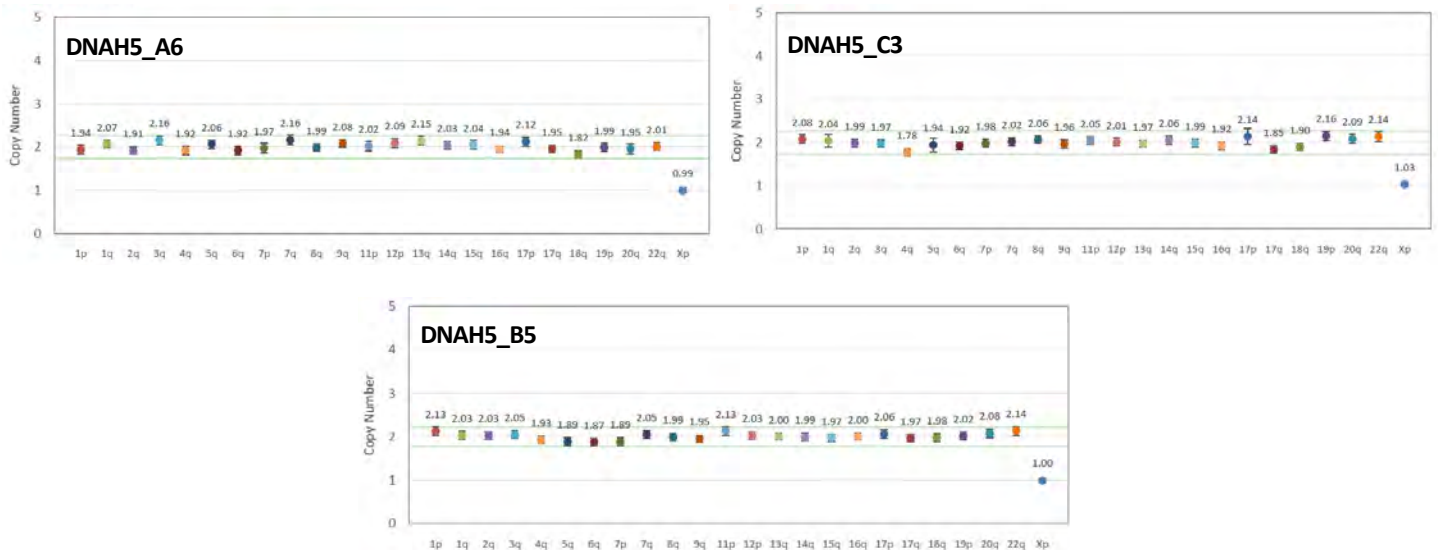



## Supplementary Figure S11

### a Integrative lentiviral vector plasmids

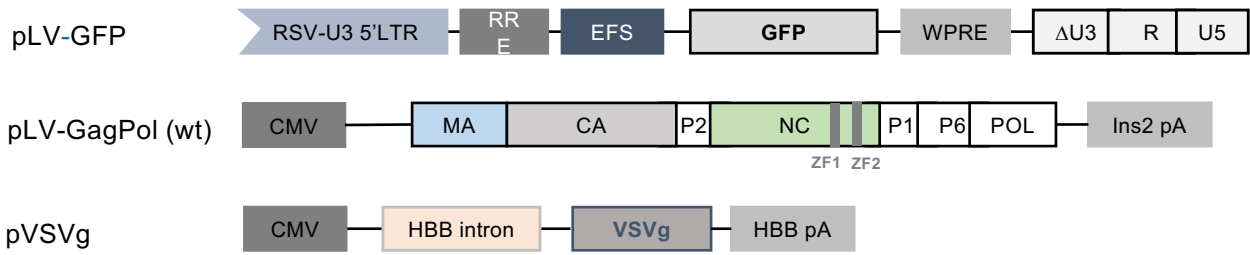

### b Non integrative LentiFlash<sup>®</sup> vector plasmids

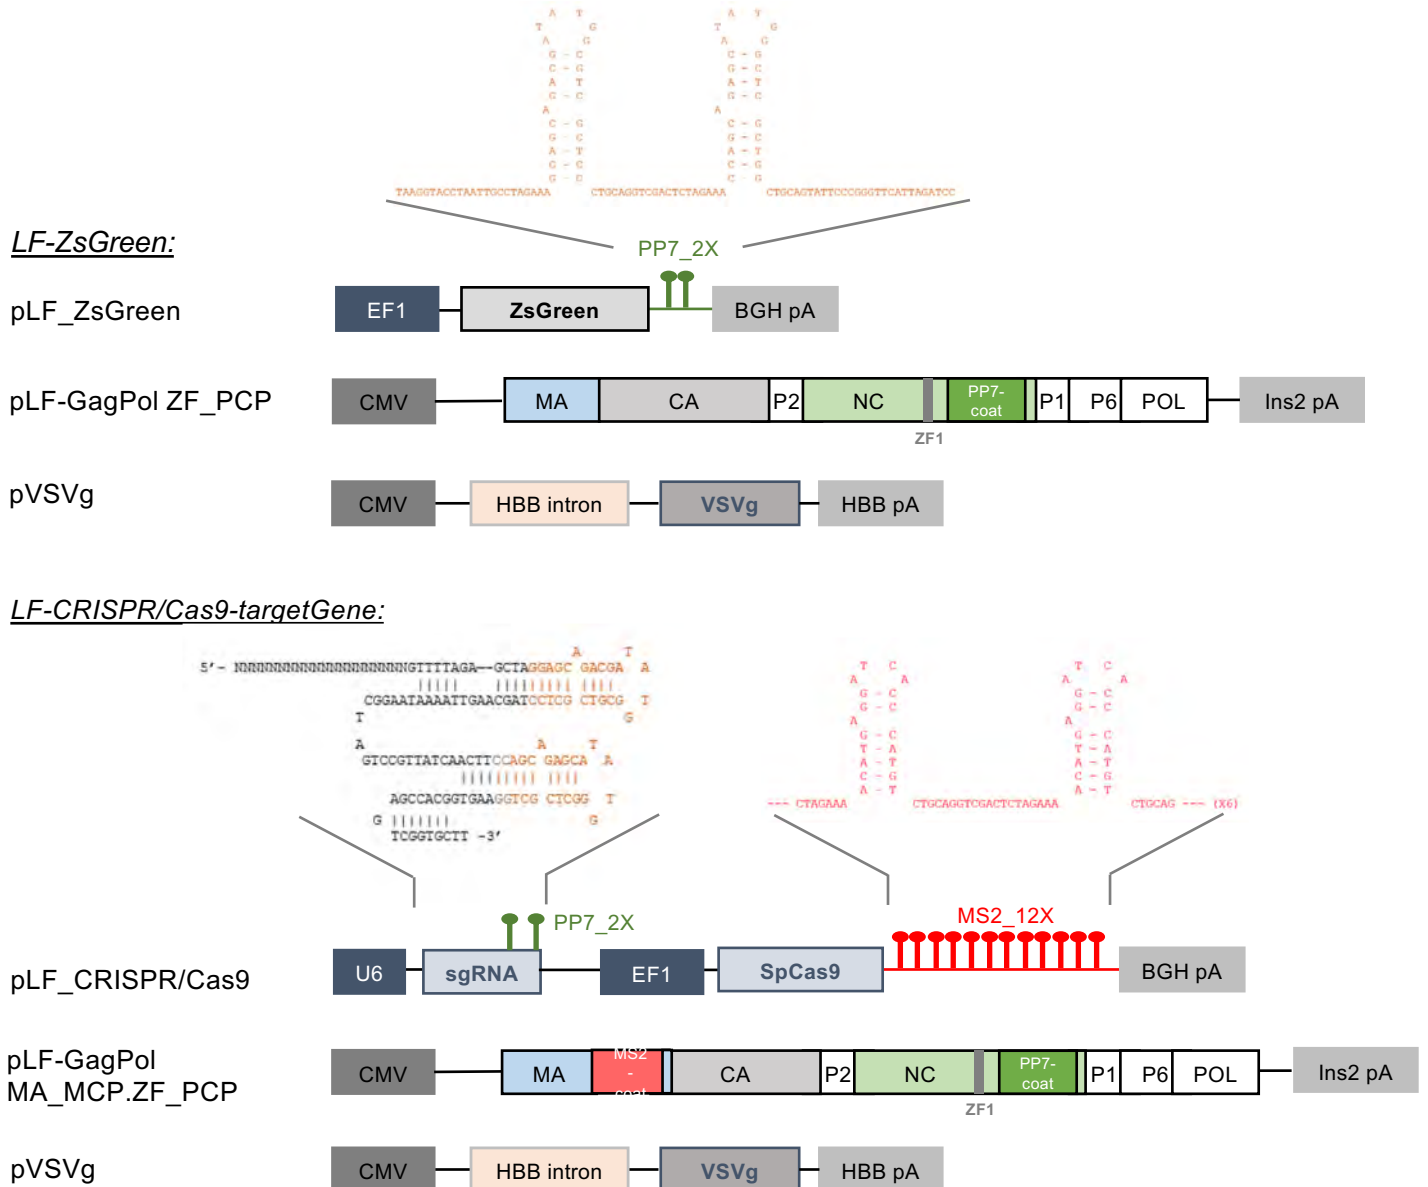



***Supplementary Tables***

## Supplementary Table S1

| sgRNA name | 5'-3' sequence       | PAM (5'-3') |
|------------|----------------------|-------------|
| GFP        | GACCAGGATGGGCACCACCC | CGG         |
| DNAH5      | GGATGACGTTGGGCCACGAG | CGG         |
| MCIDAS     | GTAGCGAAGAGCAGTCAGCG | AGG         |
| TRAC       | GAGAATCAAATCGGTGAAT  | AGG         |
| CXCR4      | GAAGCGTGATGACAAAGAGG | AGG         |
| CCDC40     | CAGGTCTTGGTGTAGAGCGC | GGG         |

## Supplementary Table S2

| Names              | 5'-3' sequence                                                                                   | Used for      |
|--------------------|--------------------------------------------------------------------------------------------------|---------------|
| ddPCR_GFP_F        | CTGCTGCCCGACAACCAC                                                                               | ddPCR         |
| ddPCR_GFP_R        | TCACGAACTCCAGCAGGAC                                                                              | ddPCR         |
| ddPCR_GFP_probe    | CCAGTCCGCCCTGAGCAAAGACC                                                                          | ddPCR         |
| ddPCR_CCDC40_YGT_F | CAGAAGGAGGAGGAGCTG                                                                               | ddPCR         |
| ddPCR_CCDC40_YGT_R | AAACCCCTCCAGGACCG                                                                                | ddPCR         |
| CCDC40_YGT_probe   | CGCTCTcACA                                                                                       | ddPCR         |
| ddPCR_RPP30_F      | TCAGCATGGCGGTGTTT                                                                                | ddPCR         |
| ddPCR_RPP30_R      | GCTGTCTCCACAAGTC                                                                                 | ddPCR         |
| ddPCR_RPP30_probe  | TTCTGACCTGAAGGCTCTGCGC                                                                           | ddPCR         |
| GFP_F1             | ATTGAACCCGGTGCCTAGAGA                                                                            | genotyping    |
| GFP_R1             | TTCATGTGGTCGGGGTAGC                                                                              | genotyping    |
| DNAH5_F4           | AATGGATGCATGCTAAGTGAGTAA                                                                         | genotyping    |
| DNAH5_R4           | GCCTCCAAAGTGATGTGAGGG                                                                            | genotyping    |
| DNAH5_F3           | ACTTTAGCGTCTCCAGCCCC                                                                             | genotyping    |
| DNAH5_OT1_F2       | TTTGATGCTCATCTGTCTTTGA                                                                           | genotyping    |
| DNAH5_OT1_R2       | GAAACTCAGCCGCTTTTTGTCT                                                                           | genotyping    |
| DNAH5_OT1_R1       | CCAGTTCATTCTCACTGGCT                                                                             | genotyping    |
| DNAH5_OT2_F        | ACGAGTGTGCACAGGTACAG                                                                             | genotyping    |
| DNAH5_OT2_R        | GCAGTCGGCCCTGTCTATTC                                                                             | genotyping    |
| DNAH5_OT3_F3       | TGGGGATTTGGCCCTAAGATG                                                                            | genotyping    |
| DNAH5_OT3_R3       | AAACAGTCCCTGCCTCGGGA                                                                             | genotyping    |
| MCIDAS_F1          | TCTGACGTCCCTAGCTGCG                                                                              | genotyping    |
| MCIDAS_R3          | CACAATGCTTCCCCTCACCA                                                                             | genotyping    |
| MCIDAS_R2          | ACAATGCTTCCCCTCACCAG                                                                             | genotyping    |
| MCIDAS_OT1_F       | GGACGGTCAGCAGGCTACTT                                                                             | genotyping    |
| MCIDAS_OT1_R       | TCAAGACCGGGATCACCACA                                                                             | genotyping    |
| MCIDAS_OT2_F       | CACCTTGGCCATGTTGAAGC                                                                             | genotyping    |
| MCIDAS_OT2_R       | CTGAGCTGGAGAAGCTGGAC                                                                             | genotyping    |
| MCIDAS_OT3_F2      | TTGTTCCCCGCGAAGTC                                                                                | genotyping    |
| MCIDAS_OT3_R2      | TGAGAGACGGTATCCCCAGT                                                                             | genotyping    |
| MCIDAS_OT3_R1      | AAGAGAAGAGTGGAGGGGCA                                                                             | genotyping    |
| MCIDAS_OT4_F       | ACTGAGGAAAGGACTACTGG                                                                             | genotyping    |
| MCIDAS_OT4_R       | TTGTGGAAAGTAGCGTAGCCA                                                                            | genotyping    |
| MCIDAS_OT5_F       | GCAGAGGTGCTGAAACCTTC                                                                             | genotyping    |
| MCIDAS_OT5_R       | AGTGGCTTGTGATGCCCTT                                                                              | genotyping    |
| MCIDAS_OT6_F       | AAAATGACCCATCCCCTGCAA                                                                            | genotyping    |
| MCIDAS_OT6_R       | TTTAAAACCTGCTGCTAGGGTA                                                                           | genotyping    |
| TRAC_F2            | TTGATAGCTTGTGCCTGTCCC                                                                            | genotyping    |
| TRAC_R2            | GGCAAACAGCTGAGCAAAGG                                                                             | genotyping    |
| TRAC_F1            | TCACGAGCAGCTGGTTCTAA                                                                             | genotyping    |
| CXCR4_F1           | ATCTGCCTCACTGACGTTGG                                                                             | genotyping    |
| CXCR4_R2           | TTCTCTTGTGCCCTTAGCCC                                                                             | genotyping    |
| CXCR4_R1           | ATGGGCTCAGGGGACTATGA                                                                             | genotyping    |
| CCDC40_F2          | GGTGCCCTGAAGAACTACC                                                                              | genotyping    |
| CCDC40_R2          | GCATTTGCTGCTTGTCCCTGA                                                                            | genotyping    |
| CCDC40_F3          | AGCTGGGGGTGAATCTCTATGA                                                                           | genotyping    |
| CCDC40_H_F         | GTGAATCTCTATGAGGTGCAGCAG                                                                         | genotyping    |
| DNAH5_HRMA_F2      | GCATTTGCAGGTTCTTGCTG                                                                             | HRMA          |
| DNAH5_HRMA_R2      | TCCAAAAGGTAGTTAAACTGGAGA                                                                         | HRMA          |
| MCIDAS_HRMA_F2     | GTCTCCCCGCGCAGC                                                                                  | HRMA          |
| MCIDAS_HRMA_R2     | CGGACCCGAGTAGCGAAG                                                                               | HRMA          |
| ZsGreen_F          | TCTGCAACGCCGACATCA                                                                               | qPCR          |
| ZsGreen_R          | GTTACGCGGTGAACTTGGA                                                                              | qPCR          |
| Cas9_F             | AATGGCCTGTTCCGAAAACCT                                                                            | qPCR          |
| Cas9_R             | CTCAGCTGCAGTTTGGCATC                                                                             | qPCR          |
| GAPDH_F            | GACCTGACCTGCCGTCTAGAAA                                                                           | qPCR          |
| GAPDH_R            | CCTGCTTACCACCTTCTTGA                                                                             | qPCR          |
| Cas9_F             | AAACAGCAGATTCGCCTGGA                                                                             | PCR (Fig S5e) |
| Cas9_R             | TCATCCGCTCGATGAAGCTC                                                                             | PCR (Fig S5e) |
| DNAH5_NGS_F        | AATGATACGGCGACCACCGAGATCTACACTCGTGGAGCGTCGTCGG<br>CAGCGTCAGATGTGTATAAGAGACAGGTGCAATGGCTCGTGTITTT | NGS           |
| DNAH5_NGS_R        | CAAGCAGAAGACGGCATACGAGATCGCTCAGTTCTGCTCGTGGGCTC<br>GGAGATGTGTATAAGAGACAGGGCTTTTCAATTGTTCCTCA     | NGS           |

### Supplementary Table S3

| Immunofluorescence antibody name | Reference | Provider                 | dilution |
|----------------------------------|-----------|--------------------------|----------|
| OCT3/4                           | sc-9081   | Santa Cruz Biotechnology | 1/400    |
| SSEA-4                           | 90231     | Chemicon                 | 1/250    |
| NANOG                            | ab109250  | Abcam                    | 1/200    |
| SOX2                             | MA1-014   | Invitrogen               | 1/100    |
| FOXA2                            | af2400    | RD system                | 1/100    |
| SOX17                            | af1924    | RD system                | 1/100    |
| hNESTIN                          | MA1-110   | Invitrogen               | 1/100    |
| PAX6                             | mab5552   | Chemicon                 | 1/100    |
| AlexaFluor 488 anti-rabbit IgG   | A21206    | Invitrogen               | 1/1000   |
| AlexaFluor 555 anti-mouse IgG    | A31570    | Invitrogen               | 1/1000   |
| AlexaFluor 647 anti-goat IgG     | A21447    | Invitrogen               | 1/1000   |
|                                  |           |                          |          |
| FloxCytometry antibody name      | Reference | Provider                 | dilution |
| CXCR4-PE                         | 557145    | BD Biosciences           | 1/200    |
| Isotype Ctr (PE) CXCR4           | 556653    | BD Biosciences           | 1/200    |
